# Supplementary material for: ABC efflux transporters at blood-central nervous system barriers and their implications for treating spinal cord disorders
Source: PubMed Central journal article supplement — Neural Regen Res. 2020 Jan 9;15(7):1235–42. doi: 10.4103/1673-5374.272568 (PMC7047801; doi:10.4103/1673-5374.272568), 2020-01-09
Supplement: NRR-15-1235_Suppl1.pdf [file NRR-15-1235_Suppl1.pdf]

## OPEN PEER REVIEW REPORT 1

**Name of journal:** Neural Regeneration Research

**Manuscript NO:** NRR-D-19-00500

**Title:** A Review of ABC Efflux Transporters in the Blood Spinal Cord Barriers

**Reviewer's Name:** Renata Ciccarelli

**Reviewer's country:** Italy

**Date sent for review:** 2019-08-29

### COMMENTS TO AUTHORS

The paper is well written and articulated and covers the most important aspects in the topic chosen by the Authors.

The hope is that this manuscript can promote further studies on changes in expression/activity of molecule/drug transporters that can really help doctors in administering useful drugs in patients with brain or spinal damage. Indeed, despite the efforts of the authors and the accurate revision made by them of the current literature, little is still known about these aspects.

I have only one question:

at page 15, in the first lines, the Authors report the results from Wang and coll. about the pretreatment with ligands of various nuclear receptor pathways as able to increase the PGP transport functionality. I did not understand as to why Wang and coll. performed the study with this kind of molecules and therefore the meaning of this citation.
